# Supplementary material for: How to Motivate SARS-CoV-2 Convalescents to Receive a Booster Vaccination? Influence on Vaccination Willingness
Source: MDPI journal article supplement (doi:10.3390/vaccines10030455), 2022-03-16
Supplement: s1 [file s1]

*Supplementary Materials*

# How to Motivate SARS-CoV-2 Convalescents to Receive a Booster Vaccination? Influence on Vaccination Willingness

Elias Kowalski <sup>1,2</sup>, Andreas Stengel <sup>1,3</sup>, Axel Schneider <sup>2</sup>, Miriam Goebel-Stengel <sup>1,4</sup>, Stepan Zipfel <sup>1</sup>, and Johanna Graf <sup>1,\*</sup>

<sup>1</sup> Department of Psychosomatic Medicine and Psychotherapy, University Hospital Tübingen, 72076 Tübingen, Germany

<sup>2</sup> Health Department Freudenstadt, 72250 Freudenstadt, Germany

<sup>3</sup> Charité Center for Internal Medicine and Dermatology, Department for Psychosomatic Medicine, Charité-Universitätsmedizin Berlin, Corporate Member of Freie Universität Berlin, Humboldt-Universität zu Berlin and Berlin Institute of Health, 10117 Berlin, Germany

<sup>4</sup> Internal Medicine and Gastroenterology, Helios Klinik Rottweil, 78628 Rottweil, Germany

\* Correspondence: johanna.graf@med.uni-tuebingen.de ; Tel.: +49 7071 29-86719

**Table S1.** Differences in vaccination attitudes regarding sociodemographic aspects (n = 224).

|                                          | SARS-CoV-2<br>vaccination<br>willingness | In favor of a high<br>SARS-CoV-2<br>vaccination rate | In favor of<br>pandemic defeat<br>with vaccination | In favor of<br>general mandatory<br>vaccination | In favor of<br>medical mandatory<br>vaccination | Fear of adverse<br>vaccination<br>outcomes |
|------------------------------------------|------------------------------------------|------------------------------------------------------|----------------------------------------------------|-------------------------------------------------|-------------------------------------------------|--------------------------------------------|
| <b>Gender</b>                            |                                          |                                                      |                                                    |                                                 |                                                 |                                            |
| <i>U</i>                                 | 6121.5                                   | 5725.5                                               | 5712.0                                             | 5691.0                                          | 4897.5                                          | 5230.5                                     |
| <i>Z</i>                                 | −0.282                                   | −1.131                                               | −1.129                                             | −1.263                                          | −2.912                                          | −2.128                                     |
| <i>Mdn (female)</i>                      | 80.0                                     | 81.0                                                 | 73.5                                               | 0.0                                             | 10.0                                            | 69.5                                       |
| <i>Mdn (male)</i>                        | 80.0                                     | 98.0                                                 | 65.5                                               | 2.0                                             | 52.5                                            | 50.0                                       |
| <i>p</i>                                 | 0.778                                    | 0.258                                                | 0.259                                              | 0.207                                           | <b>0.004 **</b>                                 | <b>0.033 *</b>                             |
| <b>Nationality</b>                       |                                          |                                                      |                                                    |                                                 |                                                 |                                            |
| <i>U</i>                                 | 2563.5                                   | 2792.5                                               | 3073.0                                             | 3259.5                                          | 3071.0                                          | 2957.5                                     |
| <i>Z</i>                                 | −2.178                                   | −1.515                                               | −0.672                                             | −0.148                                          | −0.698                                          | −1.001                                     |
| <i>Mdn (local<br/>nationality)</i>       | 81.0                                     | 91.0                                                 | 70.0                                               | 0.0                                             | 41.0                                            | 50.0                                       |
| <i>Mdn (foreign<br/>background)</i>      | 50.0                                     | 60.0                                                 | 54.0                                               | 0.0                                             | 30.0                                            | 52.0                                       |
| <i>p</i>                                 | <b>0.029 *</b>                           | 0.130                                                | 0.502                                              | 0.882                                           | 0.485                                           | 0.317                                      |
| <b>Educational level</b>                 |                                          |                                                      |                                                    |                                                 |                                                 |                                            |
| <i>U</i>                                 | 5362.5                                   | 4839.0                                               | 5425.5                                             | 5316.5                                          | 5174.0                                          | 4941.5                                     |
| <i>Z</i>                                 | −0.812                                   | −1.987                                               | −0.657                                             | −0.963                                          | −1.241                                          | −1.708                                     |
| <i>Mdn<br/>(low education)</i>           | 73.0                                     | 81.0                                                 | 66.0                                               | 0.0                                             | 27.0                                            | 60.0                                       |
| <i>Mdn<br/>(high education)</i>          | 83.0                                     | 99.0                                                 | 70.0                                               | 10.0                                            | 50.0                                            | 32.0                                       |
| <i>p</i>                                 | 0.417                                    | <b>0.047 *</b>                                       | 0.511                                              | 0.335                                           | 0.214                                           | 0.088                                      |
| <b>Children</b>                          |                                          |                                                      |                                                    |                                                 |                                                 |                                            |
| <i>U</i>                                 | 4835.0                                   | 4897.0                                               | 4364.5                                             | 5193.0                                          | 5140.5                                          | 5482.0                                     |
| <i>Z</i>                                 | −1.986                                   | −1.857                                               | −2.966                                             | −1.253                                          | −1.317                                          | −0.533                                     |
| <i>Mdn (no children)</i>                 | 52.0                                     | 77.0                                                 | 50.0                                               | 0.0                                             | 20.0                                            | 57.0                                       |
| <i>Mdn (children)</i>                    | 83.0                                     | 95.0                                                 | 78.0                                               | 4.0                                             | 50.0                                            | 50.0                                       |
| <i>p</i>                                 | <b>0.047 *</b>                           | 0.063                                                | <b>0.003 **</b>                                    | 0.210                                           | 0.188                                           | 0.594                                      |
| <b>Financial pandemic-related losses</b> |                                          |                                                      |                                                    |                                                 |                                                 |                                            |
| <i>U</i>                                 | 6053.5                                   | 5756.5                                               | 5463.0                                             | 6091.5                                          | 6131.0                                          | 6142.5                                     |
| <i>Z</i>                                 | −0.455                                   | −1.092                                               | −1.674                                             | −0.394                                          | −0.293                                          | −0.260                                     |
| <i>Mdn (no loss)</i>                     | 81.0                                     | 93.0                                                 | 71.0                                               | 0.0                                             | 25.0                                            | 50.0                                       |
| <i>Mdn (loss)</i>                        | 71.0                                     | 81.0                                                 | 61.0                                               | 0.0                                             | 50.0                                            | 52.0                                       |
| <i>p</i>                                 | 0.649                                    | 0.275                                                | 0.094                                              | 0.693                                           | 0.770                                           | 0.795                                      |

Statistics performed with Mann-Whitney U test. *U* = Mann-Whitney U. *Z* = z-value. *p* = p-value. \*  $p < 0.05$ , \*\*  $p < 0.01$ . Bold values are significant.

**Table S2.** Differences in vaccination willingness regarding age (n = 224).

|                     | Standard test statistics | Standard error | Significance (p) |
|---------------------|--------------------------|----------------|------------------|
| <i>Young-Middle</i> | −3.545                   | 9.538          | <0.001 ***       |
| <i>Young-Old</i>    | −3.233                   | 14.823         | 0.001 **         |
| <i>Middle-Old</i>   | −1.031                   | 0.302          | 0.907            |

Statistics performed with Kruskal-Wallis test.  $p$  =  $p$ -value. \*\*  $p < 0.01$ , \*\*\*  $p < 0.001$ . Bold values are significant.

**Table S3.** Differences in vaccination attitudes regarding sociodemographic aspects, somatic factors, attitudes toward governmental regulations, subjective informativeness, and susceptibility to conspiracy theories (n = 224).

|                                                                             |          | In favor of a high<br>SARS-CoV-2<br>vaccination rate | In favor of<br>pandemic defeat<br>with vaccination | In favor of<br>general mandatory<br>vaccination | In favor of medical<br>mandatory<br>vaccination | Fear of adverse<br>vaccination<br>outcomes |
|-----------------------------------------------------------------------------|----------|------------------------------------------------------|----------------------------------------------------|-------------------------------------------------|-------------------------------------------------|--------------------------------------------|
| <b>Sociodemographic aspects</b>                                             |          |                                                      |                                                    |                                                 |                                                 |                                            |
| Age                                                                         | <i>r</i> | 0.307                                                | 0.351                                              | 0.158                                           | 0.150                                           | −0.157                                     |
|                                                                             | <i>p</i> | <b>&lt;0.001 ***</b>                                 | <b>&lt;0.001 ***</b>                               | <b>0.018 *</b>                                  | <b>0.024 *</b>                                  | <b>0.019 *</b>                             |
| Number of children                                                          | <i>r</i> | 0.076                                                | 0.168                                              | 0.066                                           | 0.047                                           | −0.016                                     |
|                                                                             | <i>p</i> | 0.255                                                | <b>0.012 *</b>                                     | 0.324                                           | 0.481                                           | 0.817                                      |
| Number of household members                                                 | <i>r</i> | −0.017                                               | 0.020                                              | 0.046                                           | 0.057                                           | 0.068                                      |
|                                                                             | <i>p</i> | 0.796                                                | 0.764                                              | 0.497                                           | 0.398                                           | 0.310                                      |
| Income (free text)                                                          | <i>r</i> | 0.289                                                | 0.203                                              | 0.112                                           | 0.088                                           | −0.187                                     |
|                                                                             | <i>p</i> | <b>&lt;0.001 ***</b>                                 | <b>0.002 **</b>                                    | 0.094                                           | 0.188                                           | <b>0.005 **</b>                            |
| Financial pandemic-related losses                                           | <i>r</i> | −0.137                                               | −0.171                                             | −0.042                                          | 0.015                                           | 0.036                                      |
|                                                                             | <i>p</i> | <b>0.040 *</b>                                       | <b>0.010 *</b>                                     | 0.531                                           | 0.828                                           | 0.597                                      |
| <b>Somatic Factors</b>                                                      |          |                                                      |                                                    |                                                 |                                                 |                                            |
| Current health                                                              | <i>r</i> | 0.035                                                | −0.007                                             | 0.040                                           | −0.009                                          | −0.113                                     |
|                                                                             | <i>p</i> | 0.606                                                | 0.916                                              | 0.548                                           | 0.894                                           | 0.091                                      |
| Worst health                                                                | <i>r</i> | 0.082                                                | 0.042                                              | 0.060                                           | 0.052                                           | −0.061                                     |
|                                                                             | <i>p</i> | 0.222                                                | 0.535                                              | 0.374                                           | 0.439                                           | 0.365                                      |
| Symptoms                                                                    | <i>r</i> | −0.026                                               | 0.137                                              | −0.016                                          | −0.057                                          | 0.130                                      |
|                                                                             | <i>p</i> | 0.700                                                | <b>0.041 *</b>                                     | 0.817                                           | 0.393                                           | 0.051                                      |
| Risk factors                                                                | <i>r</i> | −0.024                                               | −0.138                                             | −0.107                                          | 0.002                                           | 0.089                                      |
|                                                                             | <i>p</i> | 0.723                                                | <b>0.039 *</b>                                     | 0.109                                           | 0.978                                           | 0.182                                      |
| <b>Attitudes toward government's regulations</b>                            |          |                                                      |                                                    |                                                 |                                                 |                                            |
| Situation under control                                                     | <i>r</i> | 0.245                                                | 0.292                                              | 0.191                                           | 0.178                                           | −0.256                                     |
|                                                                             | <i>p</i> | <b>&lt;0.001 ***</b>                                 | <b>&lt;0.001 ***</b>                               | <b>0.004 **</b>                                 | <b>0.008 **</b>                                 | <b>&lt;0.001 ***</b>                       |
| Situation concealed                                                         | <i>r</i> | −0.432                                               | −0.376                                             | −0.254                                          | −0.260                                          | 0.283                                      |
|                                                                             | <i>p</i> | <b>&lt;0.001 ***</b>                                 | <b>&lt;0.001 ***</b>                               | <b>&lt;0.001 ***</b>                            | <b>&lt;0.001 ***</b>                            | <b>&lt;0.001 ***</b>                       |
| Federal regulations                                                         | <i>r</i> | 0.080                                                | 0.077                                              | 0.052                                           | 0.082                                           | −0.047                                     |
|                                                                             | <i>p</i> | 0.236                                                | 0.253                                              | 0.438                                           | 0.221                                           | 0.484                                      |
| Measures too harsh                                                          | <i>r</i> | −0.160                                               | −0.212                                             | −0.098                                          | −0.066                                          | 0.037                                      |
|                                                                             | <i>p</i> | <b>0.017 *</b>                                       | <b>0.001 **</b>                                    | 0.145                                           | 0.325                                           | 0.583                                      |
| <b>Subjective informativeness and susceptibility to conspiracy theories</b> |          |                                                      |                                                    |                                                 |                                                 |                                            |
| Subjective informativeness                                                  | <i>r</i> | 0.384                                                | 0.311                                              | 0.226                                           | 0.220                                           | −0.317                                     |
|                                                                             | <i>p</i> | <b>&lt;0.001 ***</b>                                 | <b>&lt;0.001 ***</b>                               | <b>0.001 **</b>                                 | <b>0.001 **</b>                                 | <b>&lt;0.001 ***</b>                       |
| Virus as bioweapon                                                          | <i>r</i> | −0.192                                               | −0.077                                             | −0.026                                          | −0.066                                          | 0.344                                      |
|                                                                             | <i>p</i> | <b>0.004 **</b>                                      | 0.253                                              | 0.701                                           | 0.328                                           | <b>&lt;0.001 ***</b>                       |
| Virus developed by pharmaceutical industry                                  | <i>r</i> | −0.277                                               | −0.251                                             | −0.027                                          | −0.060                                          | −0.145                                     |
|                                                                             | <i>p</i> | <b>&lt;0.001 ***</b>                                 | <b>&lt;0.001 ***</b>                               | 0.684                                           | 0.373                                           | <b>0.030 *</b>                             |
| Transplantation of microchips during testing                                | <i>r</i> | −0.244                                               | −0.213                                             | −0.066                                          | −0.074                                          | 0.123                                      |
|                                                                             | <i>p</i> | <b>&lt;0.001 ***</b>                                 | <b>0.001 **</b>                                    | 0.328                                           | 0.270                                           | 0.067                                      |
| More harmless than the flu                                                  | <i>r</i> | −0.275                                               | −0.278                                             | −0.209                                          | −0.102                                          | 0.096                                      |
|                                                                             | <i>p</i> | <b>&lt;0.001 ***</b>                                 | <b>&lt;0.001 ***</b>                               | <b>0.002 **</b>                                 | 0.127                                           | 0.152                                      |

*r* = Spearman's rho correlation coefficient. *p* = *p*-value. \* *p* < 0.05, \*\* *p* < 0.01, \*\*\* *p* < 0.001. Bold values are significant.
